# Supplementary material
Source: Springer Nature journal article supplement (https://www.springermedizin.de/resource/supplementary/13069_2012_124_MOESM7_ESM.pdf/9659870)

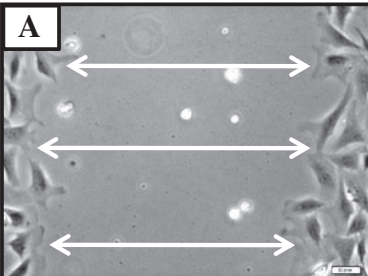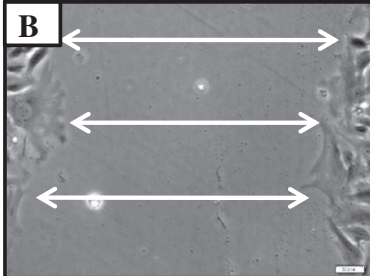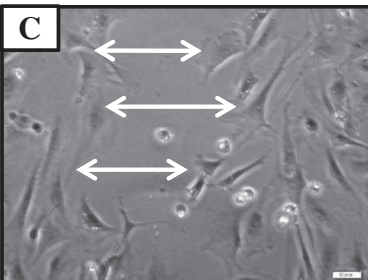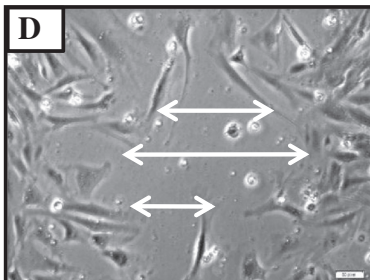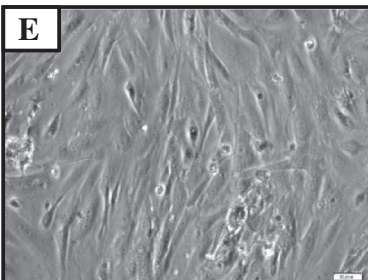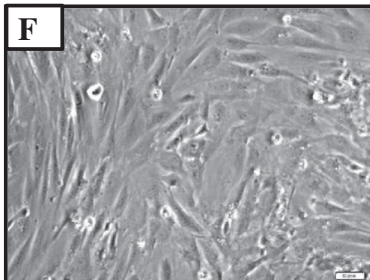

Supplement: MOESM7 [file 9659870]
